# Supplementary material
Source: PubMed Central journal article supplement (PMC2776412)
Supplement: 0910672106_0910672106SI.pdf [file 0910672106_0910672106SI.pdf]

# Supporting Information

Choi et al. 10.1073/pnas.0910672106

## SI Text

**Variation Filtering and Annotation.** The variants were re-evaluated according to the following rules: (i) calls with a Phred-like quality score of less than 45 were excluded; (ii) for heterozygous bases, reads supporting both major and minor alleles should have different start and end points; (iii) total reads at variant bases should be equal to or greater than 10; (iv) for heterozygous bases, the probability of the observed deviation of the frequencies of the major and minor alleles from the binomial distribution should be at least  $10^{-7}$ . We analyzed data including all reads, excluding all potential PCR duplicates by only analyzing reads with independent start sites, or intermediate models. Including all reads provided the highest sensitivity and specificity to detect known SNPs; consequently, data shown are based on analysis of all reads.

The filtered bases were annotated as follows: (i) novelty based on overlap with the SNP database (build 130) and 4 previously reported personal genomes (1–4); (ii) effect on the encoded protein; (iii) conservation information from phyloP scores calculated from multiple alignments of 44 vertebrate species and invertebrate orthologues in *C. elegans* and *D. melanogaster* [PhyloP scores were collected from the University of California Santa Cruz genome browser (<http://genome.ucsc.edu>) and the

orthologue lists were acquired from InParanoid (<http://inparanoid.sbc.su.se>)]; (iv) expression pattern across 79 tissues available from the expression atlas at the Genomics Institute of the Novartis Research Foundation; and (v) substitution in known micro-RNA sequences available from miRBase (release 13.0; <http://microrna.sanger.ac.uk/>).

**GenBank Accession Numbers.** GenBank accession numbers are as follows: NP\_000102.1 (human SLC26A3), NP\_067328.1 (mouse SLC26A3, 80% identity, 89% homology), NP\_001075567.1 (rabbit SLC26A3, 78% identity, 88% homology), NP\_001077145.1 (cow SLC26A3, 79% identity, 88% homology), XP\_415945.2 (chicken SLC26A3, 63% identity, 78% homology), NP\_001089015.1 (frog SLC26A3, 43% identity, 62% homology), NP\_001129155.1 (Zebrafish SLC26A3, 54% identity, 72% homology), NP\_649024.1 (fruit fly prestin, 26% identity, 44% homology), NP\_491138.2 (worm SLP6, 30% identity, 49% homology), NP\_998778.1 (human SLC26A1), NP\_000103.2 (human SLC26A2), NP\_000432.1 (human SLC26A4), NP\_945350.1 (human SLC26A5), NP\_075062.2 (human SLC26A6), NP\_439897.1 (human SLC26A7), NP\_443193.1 (human SLC26A8), NP\_001136072.1 (human SLC26A9), and NP\_775897.2 (human SLC26A11).

1. Bentley DR, et al. (2008) Accurate whole human genome sequencing using reversible terminator chemistry. *Nature* 456:53–59.
2. Ng PC, et al. (2008) Genetic variation in an individual human exome. *PLoS Genet* 4:e1000160.

3. Wang J, et al. (2008) The diploid genome sequence of an Asian individual. *Nature* 456:60–65.
4. Wheeler DA, et al. (2008) The complete genome of an individual by massively parallel DNA sequencing. *Nature* 452:872–876.

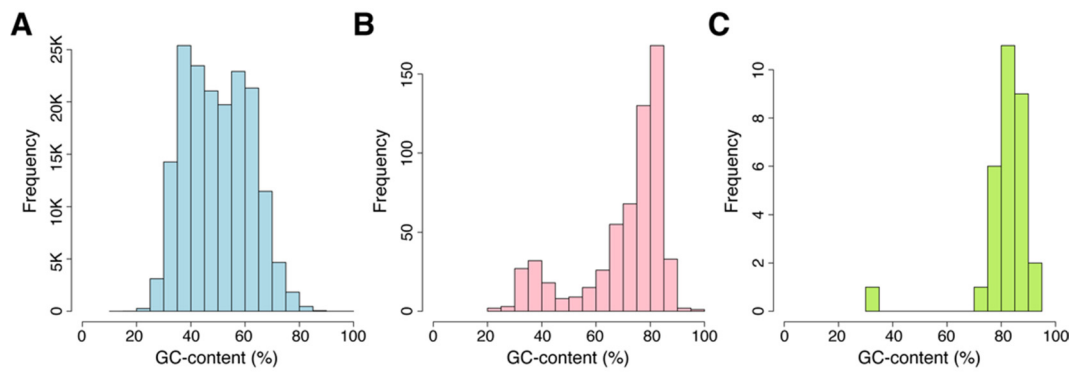

**Fig. S1.** Distribution of GC content from (A) all targeted intervals ( $n = 177,564$ ; mean GC content, 49.9%), (B) targeted intervals with all bases covered less than  $10\times$  ( $n = 787$ ; mean GC content, 68.4%), and (C) targeted intervals with no coverage at all ( $n = 30$ ; mean GC content, 81.9%).

**Table S1. LOH intervals in GIT 264–1**

| Chr   | Start       | End         | Length, bp |
|-------|-------------|-------------|------------|
| chr2  | 20,629,444  | 26,652,535  | 6,023,092  |
| chr2  | 221,496,416 | 227,234,674 | 5,738,259  |
| chr4  | 761,587     | 7,196,934   | 6,435,348  |
| chr4  | 171,974,450 | 183,281,048 | 11,306,599 |
| chr5  | 33,867,772  | 46,174,214  | 12,306,443 |
| chr5  | 49,705,738  | 68,831,574  | 19,125,837 |
| chr5  | 86,987,264  | 121,560,760 | 34,573,497 |
| chr5  | 153,966,237 | 169,946,389 | 15,980,153 |
| chr6  | 6,761,331   | 10,934,277  | 4,172,947  |
| chr6  | 19,569,799  | 58,786,624  | 39,216,826 |
| chr6  | 62,027,492  | 99,386,170  | 37,358,679 |
| chr6  | 132,920,951 | 139,733,915 | 6,812,965  |
| chr6  | 144,089,526 | 148,970,821 | 4,881,296  |
| chr7  | 25,527,037  | 40,749,097  | 15,222,061 |
| chr7  | 66,167,307  | 123,940,012 | 57,772,706 |
| chr9  | 21,673,289  | 39,088,698  | 17,415,410 |
| chr9  | 70,174,192  | 83,632,247  | 13,458,056 |
| chr9  | 92,698,855  | 124,001,125 | 31,302,271 |
| chr9  | 134,867,108 | 137,127,054 | 2,259,947  |
| chr10 | 8,388,335   | 12,046,364  | 3,658,030  |
| chr12 | 29,790,707  | 34,565,140  | 4,774,434  |
| chr12 | 36,330,311  | 92,059,960  | 55,729,650 |
| chr14 | 62,638,241  | 84,025,011  | 21,386,771 |
| chr15 | 59,255,759  | 84,920,344  | 25,664,586 |
| chr16 | 77,542,251  | 83,428,910  | 5,886,660  |
| chr19 | 53,868,842  | 57,601,319  | 3,732,478  |

**Table S2. Homozygous deletions in GIT 264-1**

| Chr:start-end                | Size, bp | SNPs | Mean LogR | Overlap with DGV CNVs, % | Overlap with genic region | Description          |
|------------------------------|----------|------|-----------|--------------------------|---------------------------|----------------------|
| chr4:173,226,303-173,227,450 | 1,148    | 3    | -4.874    | 100                      | Yes                       | Intron of GALNT6     |
| chr6:29,959,422-29,962,187   | 2,766    | 3    | -4.476    | 100                      | No                        | -                    |
| chr6:29,967,687-29,969,546   | 1,860    | 4    | -4.110    | 100                      | No                        | -                    |
| chr6:29,976,043-29,976,963   | 921      | 3    | -3.392    | 100                      | Yes                       | Intron of HLA-A*0226 |
| chr6:29,980,521-29,981,029   | 509      | 2    | -4.510    | 100                      | No                        | -                    |
| chr6:29,982,364-29,983,504   | 1,141    | 3    | -4.851    | 100                      | No                        | -                    |
| chr6:29,985,843-29,987,783   | 1,941    | 4    | -3.515    | 100                      | No                        | -                    |
| chr6:29,992,625-29,992,775   | 151      | 2    | -4.341    | 100                      | No                        | -                    |
| chr6:30,000,415-30,003,207   | 2,793    | 4    | -4.280    | 100                      | Yes                       | Intron of HLA-A*0226 |
| chr6:30,005,598-30,007,126   | 1,529    | 2    | -3.167    | 100                      | No                        | -                    |
| chr6:30,009,547-30,010,176   | 630      | 2    | -3.585    | 100                      | No                        | -                    |
| chr6:32,081,159-32,082,827   | 1,669    | 2    | -3.728    | 100                      | No                        | -                    |
| chr6:32,648,263-32,650,112   | 1,850    | 2    | -3.630    | 100                      | No                        | -                    |
| chr6:32,672,690-32,672,705   | 16       | 2    | -3.944    | 100                      | No                        | -                    |
| chr6:32,754,210-32,756,221   | 2,012    | 2    | -2.859    | 100                      | No                        | -                    |
| chr7:112,707,316-112,734,558 | 27,243   | 4    | -5.253    | 100                      | No                        | -                    |
| chr9:28,039,518-28,040,777   | 1,260    | 2    | -6.297    | 93                       | Yes                       | Intron of LINGO2     |
| chr12:33,193,705-33,197,122  | 3,418    | 6    | -5.148    | 100                      | No                        | -                    |
| chr12:58,227,690-58,228,389  | 700      | 2    | -5.186    | 100                      | No                        | -                    |
| chr12:89,012,380-89,014,390  | 2,011    | 2    | -5.550    | 100                      | No                        | -                    |

The precise endpoints of the clustered deletions in the approximate 3 Mb interval on chromosome 6 have not been defined, and some apparently non-contiguous deletions could represent a single continuous deletion.

**Table S3. Coverage of GIT 264–1 at mean 99× per-base coverage**

| Bases covered at least | Bases      | Percent, % |
|------------------------|------------|------------|
| 10×                    | 33,448,694 | 98.39      |
| 9×                     | 33,521,237 | 98.60      |
| 8×                     | 33,588,222 | 98.80      |
| 7×                     | 33,650,912 | 98.98      |
| 6×                     | 33,708,677 | 99.15      |
| 5×                     | 33,760,953 | 99.30      |
| 4×                     | 33,808,496 | 99.44      |
| 3×                     | 33,851,516 | 99.57      |
| 2×                     | 33,890,624 | 99.69      |
| 1×                     | 33,925,936 | 99.79      |
| All bases              | 33,997,546 | 100.00     |

**Table S4. Novel homozygous protein-altering variations in GIT 264–1**

| Chr   | Position    | Base change | Reads | PhyloP score | Gene     | Amino acid change | Worm orthologue |
|-------|-------------|-------------|-------|--------------|----------|-------------------|-----------------|
| chr16 | 82,678,492  | C>T         | 148   | 5.673        | MBTPS1   | R369H             | NA*             |
| chr9  | 35,707,627  | C>A         | 69    | 5.513        | TLN1     | A718S             | A               |
| chr7  | 107,201,654 | C>T         | 173   | 5.417        | SLC26A3  | D652N             | D               |
| chr12 | 47,373,772  | C>G         | 129   | 4.916        | CCNT1    | D498H             | †               |
| chr9  | 70,288,722  | G>A         | 123   | 4.900        | PGM5     | V473M             | NA              |
| chr14 | 72,507,560  | G>A         | 70    | 4.735        | ZFYVE1   | A706V             | NA              |
| chr9  | 114,064,663 | T>G         | 39    | 4.587        | ROD1     | Q158P             | NA              |
| chr12 | 48,284,364  | C>G         | 76    | 3.410        | FAM186B  | W107C             | NA              |
| chr12 | 55,934,911  | C>T         | 40    | 2.803        | R3HDM2   | R948H             | –               |
| chr6  | 29,735,201  | C>A         | 107   | 2.701        | MOG      | P72H              | NA              |
| chr7  | 92,573,124  | G>A         | 74    | 1.966        | SAMD9    | R75W              | NA              |
| chr12 | 62,771,333  | G>A         | 29    | 1.910        | SRGAP1   | V483I             | Q               |
| chr7  | 101,900,005 | C>T         | 19    | 1.886        | LRWD1    | A545V             | NA              |
| chr5  | 35,991,652  | C>A         | 142   | 1.859        | UGT3A1   | V383L             | V               |
| chr15 | 64,644,195  | G>A         | 45    | 1.762        | LCTL     | T52M              | I               |
| chr6  | 32,196,828  | A>G         | 18    | 1.578        | ATF6B    | S203P             | NA              |
| chr12 | 91,699,921  | G>A         | 120   | 1.397        | EEA1     | S1091L            | I               |
| chr2  | 26,393,310  | A>G         | 71    | 1.347        | GPR113   | L100P             | NA              |
| chr7  | 97,771,596  | C>T         | 70    | 1.214        | BAIAP2L1 | V424M             | NA              |
| chr7  | 29,572,841  | C>A         | 13    | 1.196        | PRR15    | P124H             | NA              |
| chr6  | 42,940,693  | G>A         | 35    | 1.142        | KIAA0240 | R924Q             | NA              |
| chr14 | 73,467,985  | A>T         | 107   | 0.561        | ZNF410   | E475D             | NA              |
| chr19 | 54,908,654  | A>G         | 71    | 0.514        | CPT1C    | M787V             | NA              |
| chr4  | 1,335,522   | A>C         | 136   | 0.442        | KIAA1530 | N150T             | A               |
| chr6  | 26,080,158  | A>G         | 236   | 0.340        | TRIM38   | Y197C             | S               |
| chr12 | 48,236,487  | T>C         | 78    | –0.374       | KCNH3    | S846P             | NA              |
| chr12 | 48,267,781  | C>G         | 108   | –0.428       | FAM186B  | E852D             | NA              |
| chr12 | 51,959,832  | G>T         | 127   | –0.469       | ESPL1    | R805I             | NA              |
| chr12 | 48,280,321  | A>C         | 49    | –1.286       | FAM186B  | F457V             | NA              |

\*The protein does not have invertebrate orthologue.

†The amino acid sequence does not align to the orthologue.

NA, not applicable.
